# Supplementary material
Source: PubMed Central journal article supplement (PMC1964811)

Schleinitzia novoguineensis 57/84

Desmanthus fruticosus 109/92

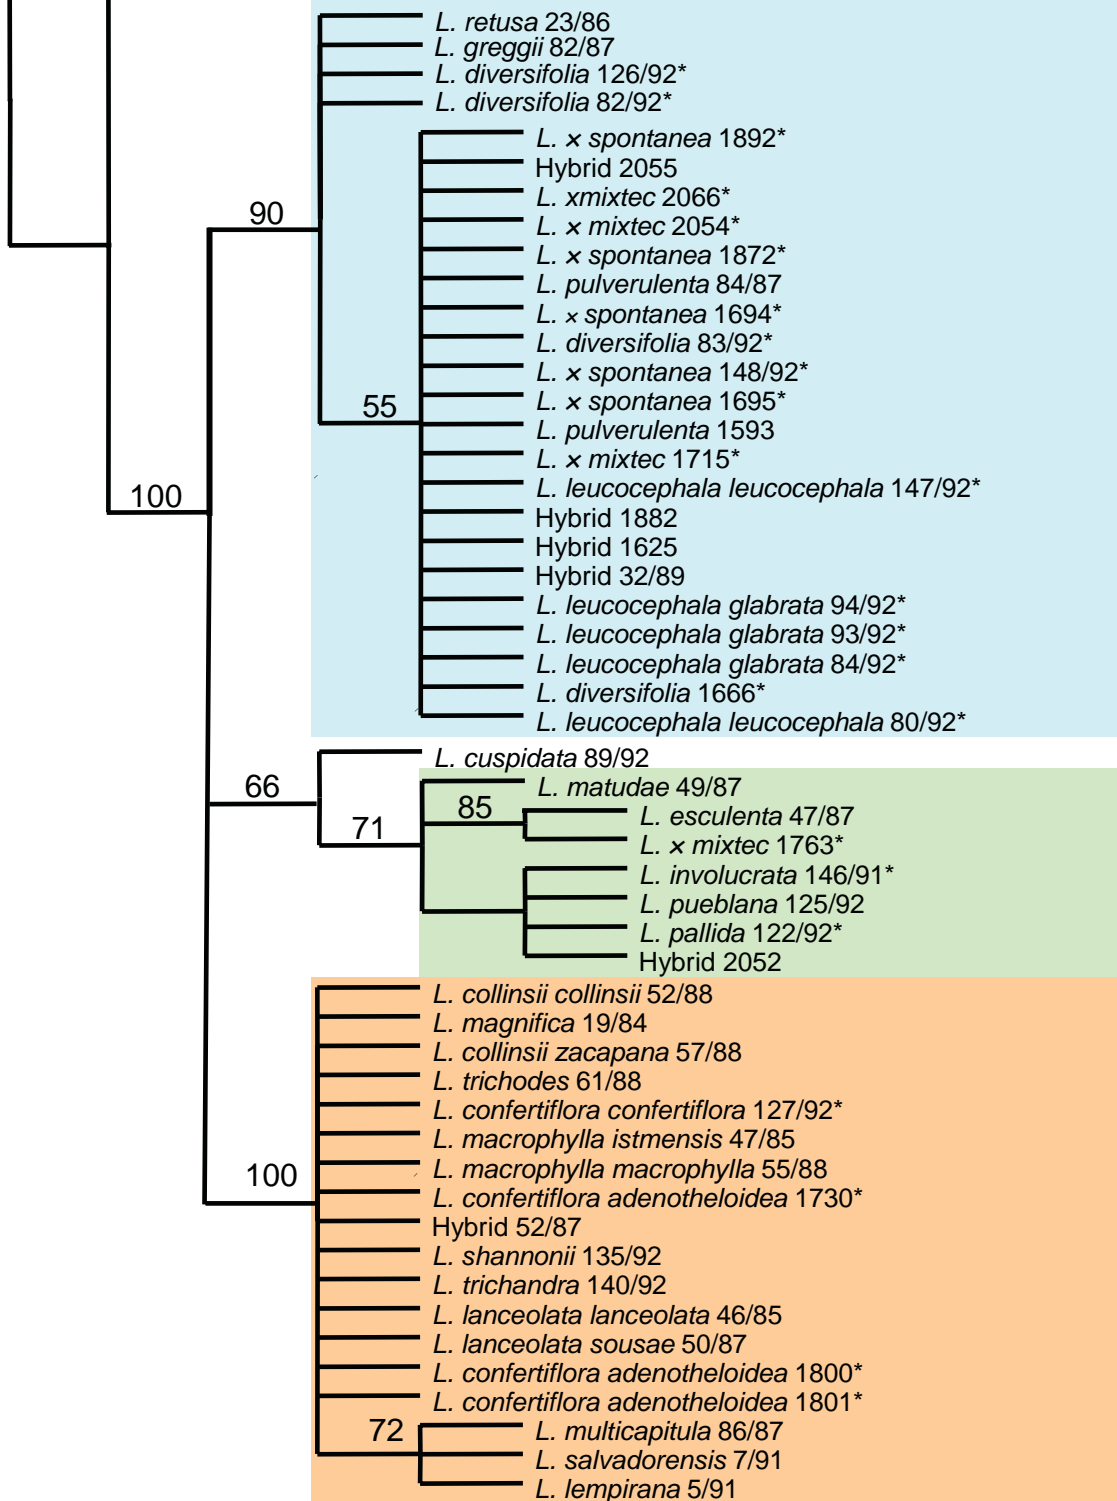

Supplement: pnas_0702193104_1.pdf [file pnas_0702193104_1.pdf]

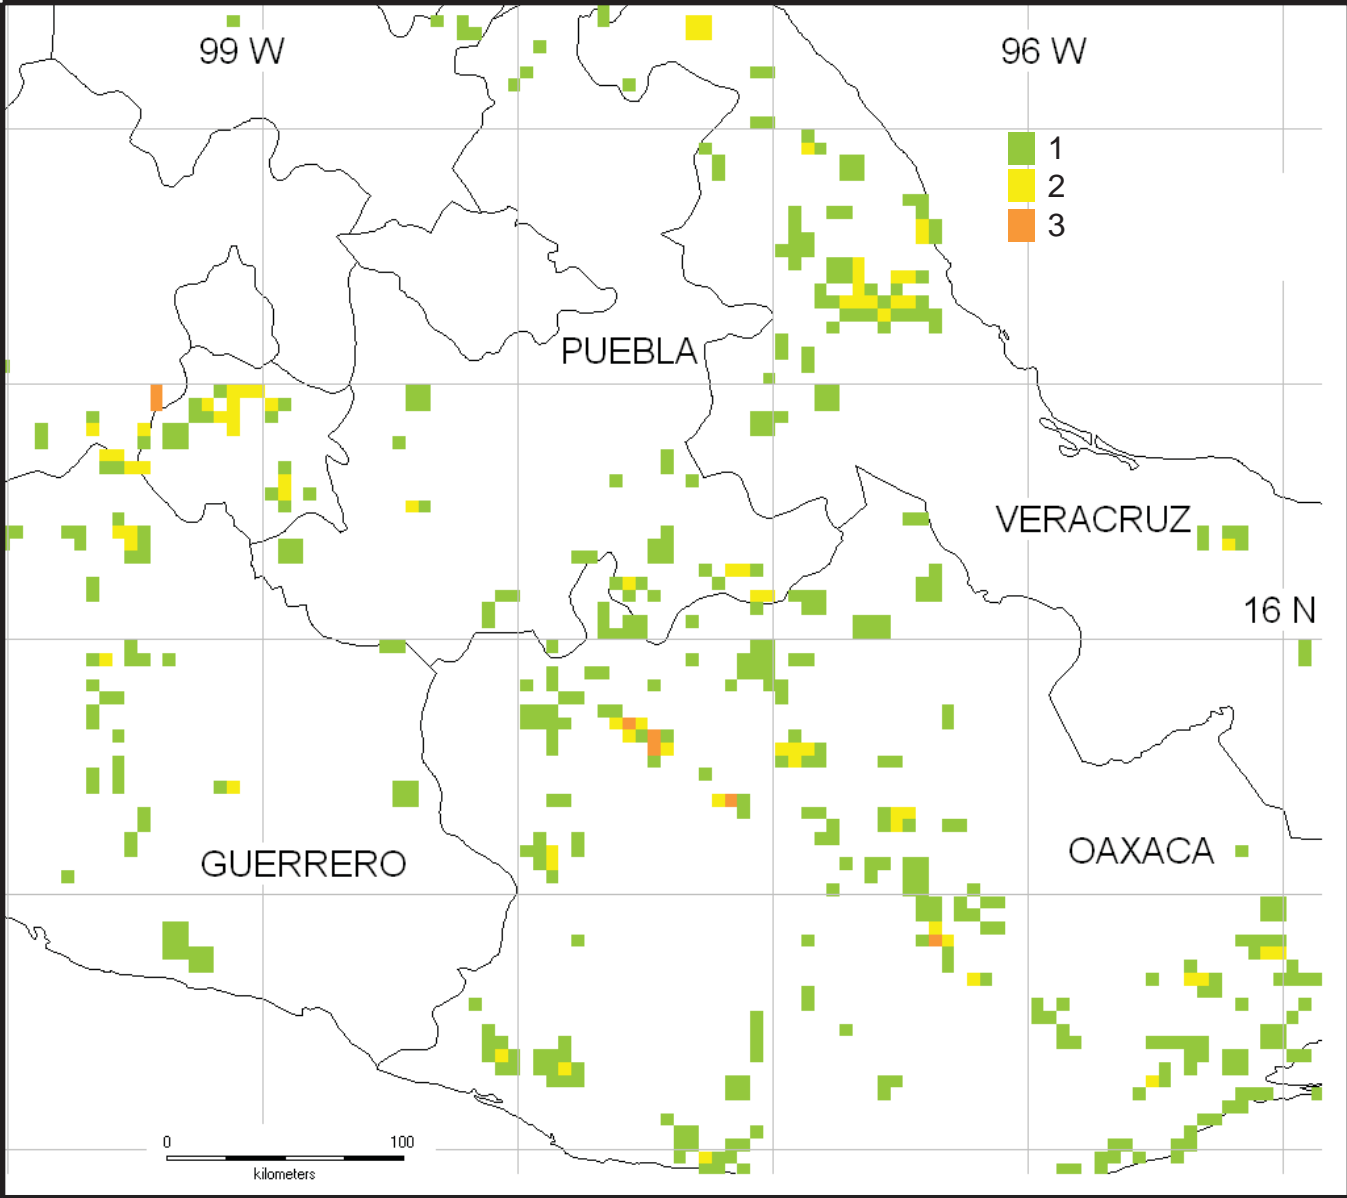

Supplement: pnas_0702193104_2.pdf [file pnas_0702193104_2.pdf]

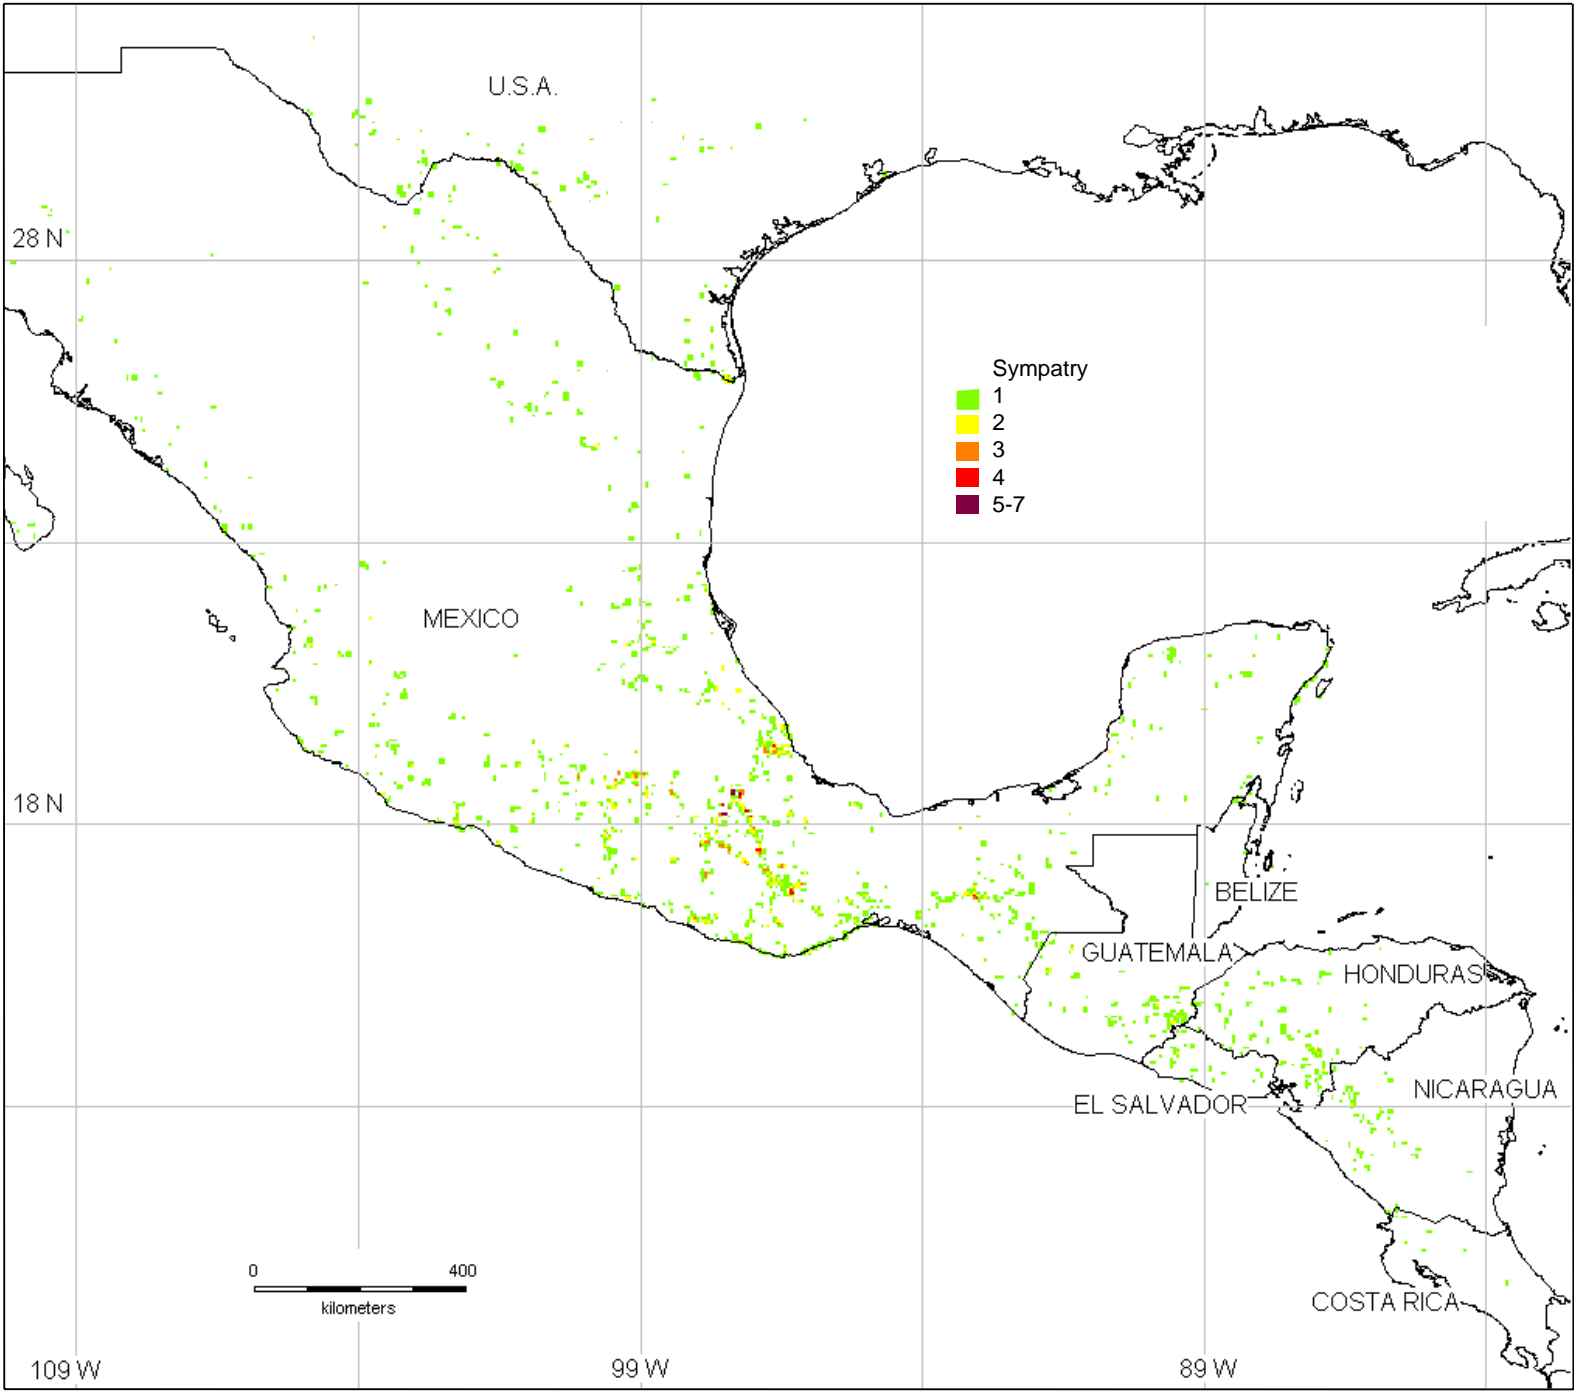

Supplement: pnas_0702193104_3.pdf [file pnas_0702193104_3.pdf]

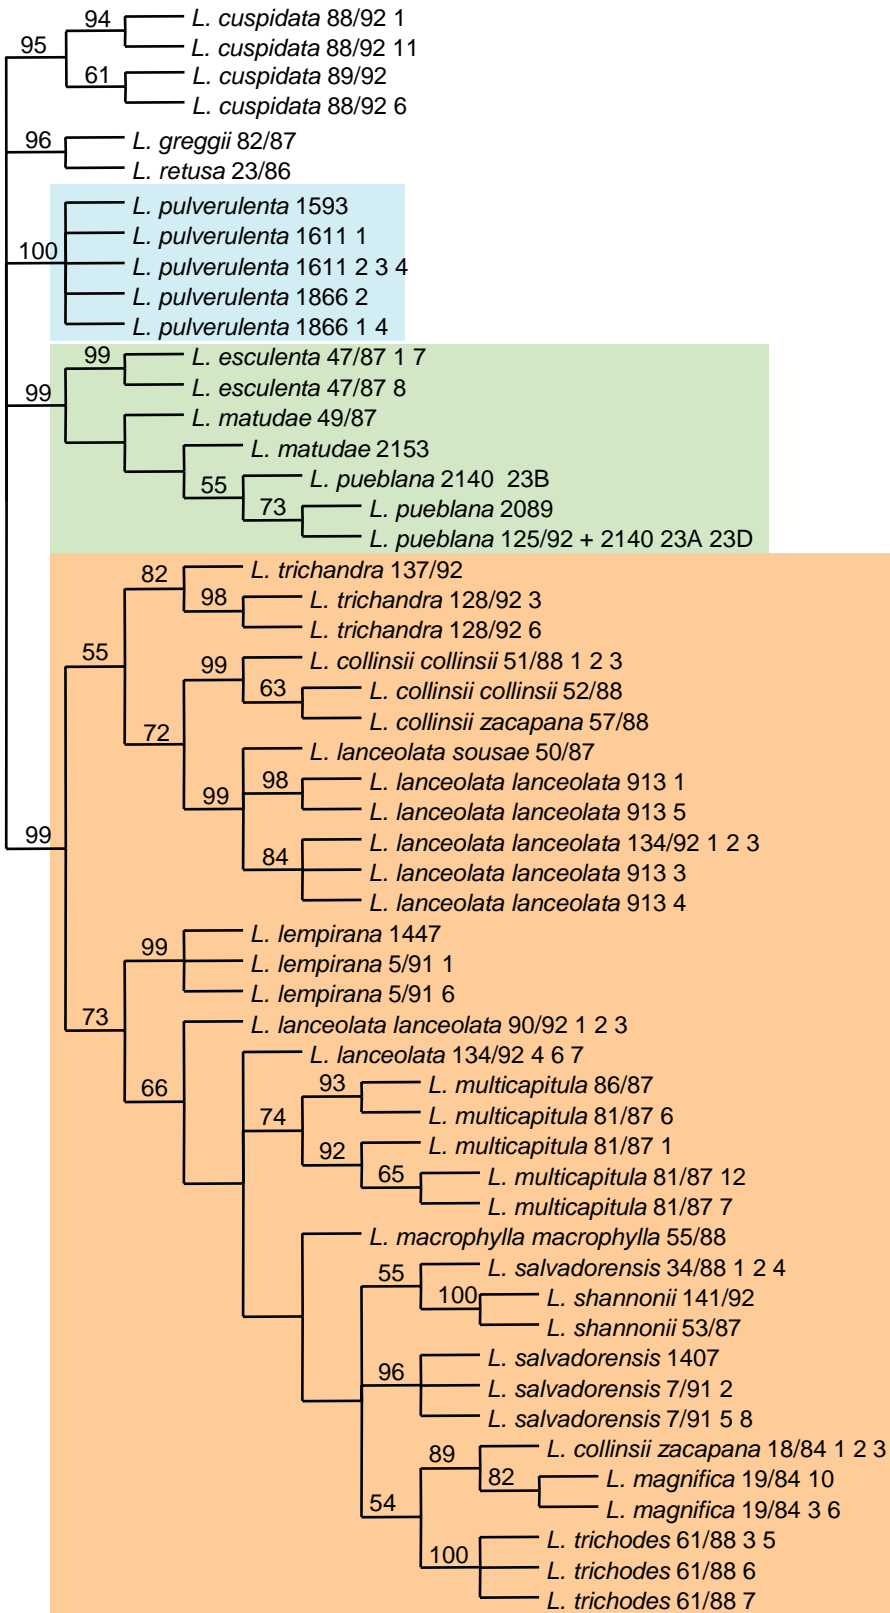

Supplement: pnas_0702193104_4.pdf [file pnas_0702193104_4.pdf]
